# Supplementary material
Source: Research Square preprint supplement (doi:10.21203/rs.3.rs-9215421/v1)
Supplement: Supplementary file 1 [file c9fdaf35b770e31e14b70ed2.docx]

**Table 1: Morphological and physical Properties of the Geological formations**

|  |  |  |  | PARTICLE SIZE DISTRIBUTION | | |  |  |  |  |  |
| --- | --- | --- | --- | --- | --- | --- | --- | --- | --- | --- | --- |
| FORMATION | LOCATION | HORIZON | DEPTH (cm) | %SAND | %CLAY | %SILT | TEXTURE | STRUCTURE | CONSISTENCY | COLOUR |  |
|  |  |  | | | | | | | | |  |
| Abeokuta Fromation | Ayetoro | Ap | 0-16 | 51.58 | 45.22 | 3.20 | SCL | Cbk | VFR | Dark brown(7.5YR3/4) |  |
| B1 | 16-70 | 68.15 | 27.28 | 4.57 | SCL | Cbk | VFR | Dark brown(7.5YR3/4) |  |
|  | | | | | | | | | |
| Ap | 0-10 | 58.22 | 41.42 | 0.35 | LS | Cr | FR | Very dark brown(10YR2/2) |  |
| B1 | 10—36 | 53.36 | 45.94 | 0.70 | SCL | Gr | FR | yellowish red(5YR4/6) |  |
|  |  | | | | | | | | |  |
| Odogbolu | Ap | 0-16 | 65.08 | 33.42 | 1.50 | CL | Msbk | Mfir | Very dark greyish brown(10YR3/2) |  |
| B1 | 16-46 | 71.79 | 25.79 | 2.42 | SCL | Fsbk | mfir | Very yellowish(5YR4/6) |  |
| B2 | 46-100 | 65.08 | 33.42 | 1.50 | SCL | fsbk | Mfir | Red(2.5YR4/8) |  |
|  | | | | | | | | |  |
| Ap | 0-14 | 66.65 | 29.79 | 3.56 | SCL | Mabk | Mfri | Dark brown(7.5YR3/4) |  |
| B1 | 14-30 | 68.22 | 28.42 | 3.35 | SCL | Mfbk | Mfir | Yellowish red(5 YR4/3) |  |
| Bt | 31-119 | 61.36 | 35.94 | 2.70 | SCL | Mfbk | Mfir | Red(2.5YR4/8) |  |
| Oshosun Formation | Ibese | Ap | 0-16 | 71.50 | 27.00 | 1.50 | Ls | GR | LO | very dusky red |  |
| B1 | 16-60 | 57.58 | 42.07 | 0.35 | SCL | fsbk | VFR | Dark red |  |
| B2 | 60-100 | 57.36 | 42.22 | 0.42 | SCL | Msbk | mfi | Dark red |  |
| Bt | 100-180 | 53.36 | 45.14 | 1.50 | Scl | Cabk | mfi | Dark red |  |
|  |  |  |  |  |  |  |  |  |  |
| Ap | 0-30 | 47.36 | 52.22 | 0.42 | LS | fsbk | LO | very dusky red |  |
| B1 | 30-63 | 51.36 | 48.22 | 0.42 | LS | Msbk | mfr | Dark red |  |
| B2 | 63-104 | 54.29 | 45.22 | 0.50 | SCL | Mabk | mfr | Dark red |  |
| Bt | 104-180 | 70.36 | 28.54 | 1.10 | SCL | Cabk | Mfi | Dark red |  |
|  |  |  |  |  |  |  |  |  |  |  |
| Ijebu-Ife | Ap | 0-20 | 72.50 | 27.43 | 0.06 | LS | Cr | LO | Dark reddish brown |  |
| B1 | 20-46 | 52.36 | 46.14 | 1.50 | SCL | Cabk | VFR | Dark red |  |
| B2 | 46-84 | 64.36 | 32.22 | 3.42 | SCL | Cabk | VFR | Red |  |
| Bt | 84-170 | 74.65 | 24.08 | 1.27 | SCL | Cabk | VFR | Red |  |
|  |  |  |  |  |  |  |  |  |  |
| Ap | 0-20 | 65.58 | 33.14 | 1.28 | LS | Cr | LO | Very Dark brown |  |
| B1 | 20-45 | 51.29 | 46.07 | 2.64 | SCL | Cabk | VFR | Dark brown |  |
| B2 | 45-84 | 63.50 | 36.06 | 0.44 | SCL | Cabk | VFR | Red |  |
| Bt | 84-180 | 67.50 | 32.14 | 0.35 | SCL | Cabk | VFR | Red |  |

GR = granular, Fsbk = fine subangular blocky, Msbk = Medium subangular blocky, Cr = crumb, Cabk = coarse angular blocky; Lo = loose,Vfr=very friable, Mfi = moderately firm, Ls = loamy sand, SCL = sandy clay loam, Pedon 1 = cultivated land, Pedon 2 = uncultivated

**Table 2: The chemical properties of the geological formations.**

| Formations | Location | Profile | depth(cm) | pH(H20) | Ca | Mg | TEA | OC | Avai-P |
| --- | --- | --- | --- | --- | --- | --- | --- | --- | --- |
| cmol/kg | (g/kg) | (mg/kg) |
|  |  |  |  |  |  | | |  |  |
| Abeokuta Formation | Ayetoro | Cul. | 0-16 | 6.15 | 3.6 | 4.5 | 0.2 | 3.2 | 1.42 |
| 16-70 | 6.15 | 4.1 | 5.3 | 0.7 | 3.6 | BLD |
|  |  | | | | | | |
| Uncul. | 0-10 | 6.55 | 4.3 | 6.2 | 0.5 | 18.0 | 8.69 |
| 10_36 | 6.7 | 3.3 | 4.9 | 0.3 | 5.2 | 2.14 |
|  |  |  | | | | | | |
| Odogbolu | Cul. | 0-16 | 7.15 | 2.7 | 3.8 | 0.1 | 7.8 | 71.92 |
| 16-46 | 6.65 | 3.6 | 3.7 | 0.4 | 2.2 | 8.12 |
| 46-100 | 6.15 | 5.5 | 8.0 | 0.2 | 3.0 | BLD |
|  |  | | | | | | |
| Uncul. | 0-14 | 5.95 | 3.3 | 4.4 | 0.1 | 3.8 | 8.26 |
| 14-30 | 6.5 | 3.3 | 4.5 | 0.3 | 1.8 | 0 |
| 31-119 | 5.25 | 3.5 | 3.6 | 0.7 | 3.0 | BLD |
|  |  |  | Mean | 6.32 | 3.72 | 4.89 | 0.35 | 15 | 9.94 |
|  |  |  | CV (%) | 8.16 | 20.62 | 27.58 | 63.53 | 45.39 | 222.4 |
|  |  |  |  | | | | | | |
| Oshosun Formation | Ibese | Cul. | 0-16 | 5.85 | 3.0 | 6.7 | 0.2 | 5.4 | 7.97 |
| 16-60 | 6.2 | 3.9 | 4.1 | 0.1 | 1.8 | 1.14 |
| 60-100 | 6.15 | 3.2 | 4.1 | 0.2 | 0.4 | -0.14 |
| 100-180 | 6.15 | 3.3 | 11.0 | 0.3 | 0.8 | 9.54 |
|  |  | | | | | | |
| Uncul. | 0-30 | 5.25 | 3.6 | 5.6 | 0.5 | 1.8 | -0.28 |
| 30-63 | 5.2 | 5.2 | 6.8 | 0.7 | 1.4 | 0.85 |
| 63-104 | 5.8 | 2.6 | 4.9 | 0.7 | 2.4 | 3.42 |
| 104-180 | 6.05 | 5.7 | 5.8 | 0.1 | 3.4 | 0.28 |
|  |  |  | | | | | | |
| Ijebu-Ife | Cul. | 0-20 | 5.2 | 7.6 | 11.4 | 0.2 | 8.4 | 18.23 |
| 20-46 | 5.1 | 3 | 3.7 | 1.7 | 1.8 | -1.14 |
| 46-84 | 5.75 | 9.7 | 3.0 | 1.5 | 2.4 | -1.0 |
| 84-170 | 4.8 | 3.1 | 5.4 | 1.4 | 1.0 | -1.57 |
|  |  | | | | | | |
| Uncul. | 0-20 | 5.95 | 4.5 | 6.4 | 0.2 | 11.8 | 8.54 |
| 20-45 | 5.25 | 6.6 | 9.5 | 1.6 | 2.2 | 10.4 |
| 45-84 | 5.15 | 3.7 | 4.1 | 1.2 | 1.4 | -0.71 |
| 84-180 | 4.75 | 4 | 5.0 | 1.3 | 0.8 | -0.43 |
|  |  |  | Mean | 5.53 | 4.54 | 6.09 | 0.74 | 29 | 3.44 |
|  |  |  | CV (%) | 9.01 | 43.35 | 41.4 | 80.97 | 10.49 | 16.72 |

BLD = Below detection limit, Cul. = cultivated arable land, Uncul. = uncultivated fallow land

**Table 3: Phosphorus distribution pattern in the geological formation**

| **Formation** | **Location** | **Profile** | **Depth (cm)** | **Ca-P** | **Al-P** | **Fe-P** | **WS-P** | **Labile-P** |
| --- | --- | --- | --- | --- | --- | --- | --- | --- |
|  | **mg/kg** |
|  |  |  |  |  |  |  |  |  |
| **Abeokuta Formation** | Ayetoro | Pedon 1 | 0-16 | 3.58 | 11.16 | 29.4 | 7.13 | 27.42 |
| 16-70 | 7.36 | 4.46 | 24.41 | 8.23 | 28.51 |
|  |  |  |  |  |  |  |
| Pedon 2 | 0-10 | 6.67 | 5.58 | 32.17 | 24.13 | 16.01 |
| 10_36 | 16.22 | 4.46 | 25.52 | 7.68 | 49.35 |
|  |  |  |  |  |  |  |  |
| Odogbolu | Pedon 1 | 0-16 | 65.71 | 20.09 | 54.36 | 16.34 | 28.59 |
| 16-46 | 6.79 | 12.83 | 33.28 | 17.55 | 92.12 |
| 46-100 | 9.9 | 6.14 | 51.59 | 4.39 | 29.51 |
|  |  |  |  |  |  |  |
| Pedon 2 | 0-14 | 12.98 | 4.46 | 82.1 | 5.67 | 23.13 |
| 14-30 | 8.8 | 3.33 | 35.5 | 6.03 | 28.02 |
| 31-119 | 6.42 | 6.7 | 28.84 | 9.38 | 20.05 |
|  |  |  |  |  |  |  |  |  |
| **Oshosun Formation** | Ibese | Pedon 1 | 0-16 | 3.23 | 10.01 | 17.75 | 12.06 | 27.08 |
| 16-60 | 2.14 | 10.6 | 19.41 | 3.29 | 16.01 |
| 60-100 | 5.25 | 8.93 | 33.28 | 16.45 | 30.03 |
| 100-180 | 4.78 | 7.23 | 62.13 | 7.68 | 44.94 |
|  |  |  |  |  |  |  |
| Pedon 2 | 0-30 | 4.75 | 8.93 | 28.84 | 3.33 | 59.22 |
| 30-63 | 6.19 | 9.49 | 88.75 | 6.58 | 38.84 |
| 63-104 | 8.75 | 9.49 | 5.55 | 28.84 | 40.43 |
| 104-180 | 4.87 | 8.37 | 17.75 | 10.46 | 81.7 |
|  |  |  |  |  |  |  |  |
| Ijebu-ife | Pedon 1 | 0-20 | 6.29 | 3.35 | 56.02 | 6.03 | 26.67 |
| 20-46 | 4.53 | 13.95 | 29.95 | 4.99 | 12.58 |
| 46-84 | 7.01 | 1.67 | 29.4 | 12.06 | 29.61 |
| 84-170 | 5.37 | 16.18 | 36.61 | 8.23 | 14.3 |
|  |  |  |  |  |  |  |
| Pedon 2 | 0-20 | 12.34 | 7.81 | 79.88 | 4.94 | 50.45 |
| 20-45 | 6.86 | 8.34 | 25.52 | 12.2 | 30.16 |
| 45-84 | 9.35 | 3.35 | 66.56 | 8.77 | 13.72 |
| 84-180 | 6.72 | 11.16 | 69.89 | 7.13 | 55.93 |

**Table 4: Effects of Geology and Land use on Phosphorus forms**

|  | Al-P | | Fe-P | | Labile-P | | WS – P | | Ca-P |  |
| --- | --- | --- | --- | --- | --- | --- | --- | --- | --- | --- |
| (mg/kg) | |
|  |  | |  | | Landuse | |  | |  | |
|  |  | |  | |  | |  | |  | |
| Geology | *Cul.* | *Uncul.* | *Cul.* | *Uncul.* | *Cul.* | *Uncul.* | *Cul.* | *Uncul.* | *Cul.* | *Uncul.* |
| Abeokuta | 9.69 | 5.09 | 37.3 | 28.3 | 35.2 | 27.4 | 7.64 | 13.61 | 6.48 | 7.83 |
| Oshosun | 6.62 | 7.93 | 29.7 | 40.1 | 17 | 47.5 | 7.08 | 6.32 | 5.23 | 7.25 |
| LSD | 3.68 | | 15.62 | | 16.88 | | 4.6 | | ns | |

ns = not significant, Cul. = cultivated arable land, Uncul. = uncultivated fallow land

**Table 5. Effects of Geology and Depth on Phosphorus Forms**

|  | Al-P | | WS-P | | Ca-P | | Fe-P | | Labile-P | |
| --- | --- | --- | --- | --- | --- | --- | --- | --- | --- | --- |
| **mg/kg** | |
|  |  | |  | |  | |  | |  | |
|  |  | |  | | Depth (cm) | |  | |  | |
|  |  |  |  |  |  |  |  |  |  |  |
| Geology | *(0-30)* | *(31-180)* | *(0-30)* | *(31-180)* | *(0-30)* | *(31-180)* | *(0-30)* | *(31-180)* | *(0-30)* | *(31-180)* |
| Abeokuta | 9.37 | 5.41 | 13.45 | 7.81 | 6.72 | 7.59 | 33.3 | 32.3 | 34.1 | 28.6 |
| Oshosun | 8.22 | 6.33 | 5.51 | 7.89 | 5.75 | 6.73 | 33.5 | 36.3 | 35.4 | 29.1 |
| LSD | 3.68 | | 4.6 | | ns | | ns | | ns | |

ns= not significant, WS-P= water soluble P, Surface=0-30 cm, subsurface=31-180 cm

**Table 6a: Effects of Geology, Land use and Depth on Phosphorus forms**

|  | **Labile-P** | | | | **Al-P** | | | | **Ca-P** | | | |
| --- | --- | --- | --- | --- | --- | --- | --- | --- | --- | --- | --- | --- |
|  |  |  |  |  | **mg/kg** | | | |  | | | |
|  | **Cul.** | | **Uncul.** | | **Cul.** | | **Uncul.** | | **Cul.** | | **Uncul.** | |
|  | *Surface* | *Sub-surface* | *Surface* | *Sub-surface* | *Surface* | *Sub-surface* | *Surface* | *Sub-surface* | *Surface* | *Sub-surface* | *Surface* | *Sub-surface* |
|  |  |  |  |  |  |  |  |  |  |  |  |  |
|  |  |  |  |  |  |  |  |  |  |  |  |  |
| Abeokuta | 47.4 | 23 | 20.7 | 34.1 | 14.14 | 5.24 | 4.6 | 5.58 | 4.19 | 8.76 | 9.24 | 6.41 |
|  |  |  |  |  |  |  |  |  |  |  |  |  |
|  |  |  |  |  |  |  |  |  |  |  |  |  |
| Oshosun | 23.4 | 10.7 | 47.5 | 47.5 | 7.94 | 5.31 | 8.51 | 7.35 | 4.32 | 6.15 | 7.17 | 7.32 |
|  |  |  |  |  |  |  |  |  |  |  |  |  |
| **LSD** |  | **23.88** |  |  |  |  | ns |  |  |  | ns |  |

Sur = surface (0-30 cm), Sub = sub-surface (31-180), Cul. = cultivated arable land, Uncul. = uncultivated fallow land, ns= not significant.

**Table 6b: Effects of Geology, Land use and Depth on Phosphorus forms**

| **Fe-P** | |  | mg/kg |  | **Water soluble P** | |  |
| --- | --- | --- | --- | --- | --- | --- | --- |
| **Cul.** | | **Uncul.** | | **Cul.** | | **Uncul.** | |
| *Surface* | *Sub-surface* | *Surface* | *Sub-surface* | *Surface* | *Sub-surface* | *Surface* | *Sub-surface* |
| 42.10 | 49.20 | 37.90 | 16.00 | 8.13 | 17.16 | 5.72 | 3.84 |
| 36.60 | 38.00 | 30.00 | 26.70 | 9.05 | 6.24 | 17.84 | 9.37 |
| 26.20 | 33.30 | 40.80 | 39.40 | 6.87 | 7.29 | 4.15 | 8.49 |
| ns |  |  |  | ns |  |  |  |

Sur = surface (0-30 cm), Sub = sub-surface (31-180), Cul. = cultivated arable land, Uncul. = uncultivated fallow land, ns= not significant.
